# Supplementary material for: Eco-Friendly Method for Wood Aerogel Preparation with Efficient Catalytic Reduction of 4-Nitrophenol
Source: MDPI journal article supplement (doi:10.3390/gels9120978), 2023-12-13
Supplement: s1 [file s1]

# Supporting Information (SI)

## Eco-friendly Method for Wood Aerogel Preparation with Efficient Catalytic Reduction of 4-Nitrophenol

Qianqian Yu <sup>1,2,†</sup>, Xiaohan Sun <sup>3,†</sup>, Feng Liu <sup>1,2</sup>, Zhaolin Yang <sup>3</sup>, Shulei Wei <sup>1</sup>, Chengyu Wang <sup>3</sup>, Xin Li <sup>4</sup>, Zechen He <sup>4</sup>, Xiaodong Li <sup>1,2,5,\*</sup> and Yudong Li <sup>3,\*</sup>

- <sup>1</sup> College of Chemistry and Bioengineering, Hechi University, Hechi 546300, China; 2022660001@hcnu.edu.cn (Q.Y.); liufeng0517@163.com (F.L.); 17807893551@163.com (S.W.)
- <sup>2</sup> Guangxi Key Laboratory of Sericulture Ecology and Applied Intelligent Technology, Hechi University, Hechi 546300, China
- <sup>3</sup> Key Laboratory of Bio-Based Material Science and Technology of Ministry of Education, Northeast Forestry University, Harbin 150040, China; 18845890158@163.com (X.S.); 18845112698@163.com (Z.Y.); wangcy@nefu.edu.cn (C.W.)
- <sup>4</sup> Infrastructure and Maintenance Section, Logistics Management Service, Hechi University, Hechi 546300, China; 2022660002@hcnu.edu.cn (X.L.); hezechen1994@sina.com (Z.H.)
- <sup>5</sup> Guangxi Collaborative Innovation Center of Modern Sericulture and Silk, Hechi University, Hechi 546300, China
- \* Correspondence: lxdong\_627@163.com (X.L.); ydli@nefu.edu.cn (Y.L.)
- † These authors contributed equally to this work.

**Table S1.** List of results of FTIR

| Chemical functional groups                                      | Wavenumber (cm <sup>-1</sup> ) |
|-----------------------------------------------------------------|--------------------------------|
| conjugated $\nu$ C–O of aromatic skeletal in lignin of softwood | 1605                           |
| conjugated $\nu$ C–O of aromatic skeletal in lignin of hardwood | 1593                           |
| formation vibration C–H in lignin and xylan                     | 1463                           |
| $\nu$ C=O in xylan                                              | 1732                           |
| acetyl and hydroxyl of xylan of softwood                        | 1265                           |
| acetyl and hydroxyl of xylan of hardwood                        | 1236                           |
| $\delta$ C–H of cellulose                                       | 1423                           |
| bending vibration C–H of cellulose                              | 1370                           |
| $\nu$ C=O in cellulose and hemicellulose                        | 1158-987                       |

**Table S2.** EDS results of DBSPd

| Elements | weight percentage (%) | atomic percentage (%) |
|----------|-----------------------|-----------------------|
| C        | 44.65                 | 56.28                 |
| O        | 43.96                 | 41.60                 |
| Zr       | 3.81                  | 0.63                  |
| Pd       | 6.14                  | 0.87                  |

**Table S3.** Comparison of DBSPd with other published materials for catalytic reduction of 4-

## Nitrophenol

| Materials                             | k (min <sup>-1</sup> ) | Time consuming (min) | 4-Nitrophenol (mg·L <sup>-1</sup> ) |
|---------------------------------------|------------------------|----------------------|-------------------------------------|
| DBSPd wood aerogel (this work)        | $2.300 \times 10^{-2}$ | 3                    | $2.0 \times 10^1$                   |
| PVDF@PDA@Au membrane <sup>[1]</sup>   | $4.784 \times 10^{-3}$ | 8                    | $1.0 \times 10^2$                   |
| Au-PDA-PVDF membrane <sup>[2]</sup>   | $4.784 \times 10^{-3}$ | 5                    | $5.3 \times 10^1$                   |
| Ag/PAN fibrous network <sup>[3]</sup> | $3.600 \times 10^{-2}$ | 70                   | $2.5 \times 10^1$                   |

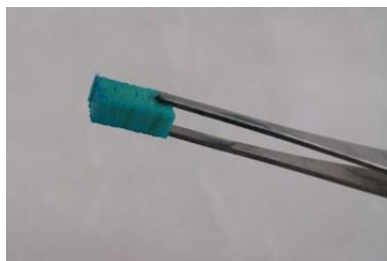

**Figure S1.** The photo of NBS after soak in a methylene blue solution

## Reference

- [1] J. Wang, Z. Wu, T. Li, J. Ye, L. Shen, Z. She, F. Liu, Catalytic PVDF membrane for continuous reduction and separation of p-nitrophenol and methylene blue in emulsified oil solution, Chemical Engineering Journal 334 (2018) 579-586.
- [2] Z. Wu, H. Lin, Y. Wang, X. Yu, J. Li, Z. Xiong, Y. Wang, Y. Huang, T. Chen, F. Liu, Enhanced catalytic degradation of 4-NP using a superhydrophilic PVDF membrane decorated with Au nanoparticles, Rsc Advances 6 (2016) 62302-62309.
- [3] S. Gao, Z. Zhang, K. Liu, B. Dong, Direct evidence of plasmonic enhancement on catalytic reduction of 4-nitrophenol over silver nanoparticles supported on flexible fibrous networks, Applied Catalysis B-Environmental 188 (2016) 245-252.
